# Supplementary material for: Selective C–C coupling of terminal alkynes under an air atmosphere without base over Cu–NX–C catalysts
Source: Royal Society of Chemistry journal article supplement (doi:10.1039/d0nj04801a), 2020-01-01

## Supporting Information for

# Selective C-C coupling of terminal alkynes under air condition without base over Cu-N<sub>x</sub>-C catalyst

XinXin Xiao<sup>†</sup>, Yin Xu<sup>†</sup>, Sangepu Bhavanarushi, Bin Liu<sup>\*</sup>, and XiaoMeng Lv<sup>\*</sup>

*<sup>a</sup>School of Chemistry and Chemical Engineering, Jiangsu University, Zhenjiang, 212013, P.R. China*

\*E-mail: [liub@ujs.edu.cn](mailto:liub@ujs.edu.cn)(B.Liu); [laiyangmeng@163.com](mailto:laiyangmeng@163.com)(X.M.Lv)

<sup>†</sup>The authors contribute equally to the work

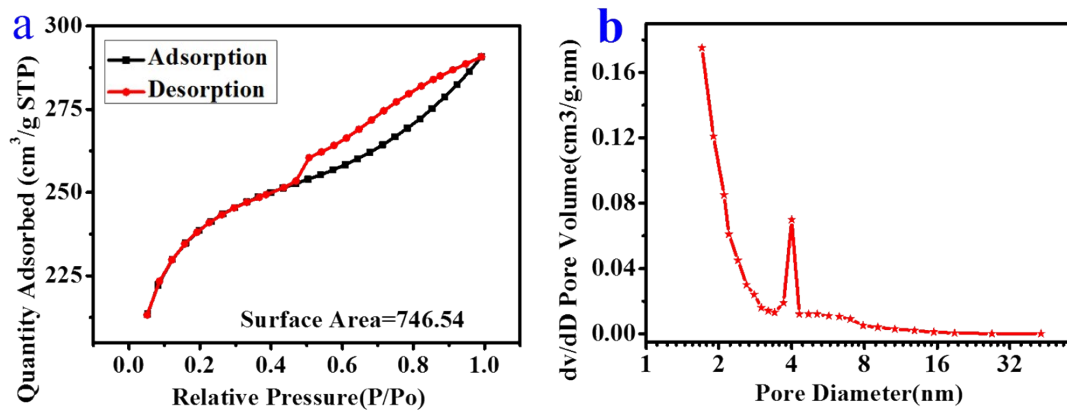

Fig S1. a) Nitrogen adsorption-desorption isotherms and b) the corresponding BJH pore-size distribution curve of Cu-Nx-C.

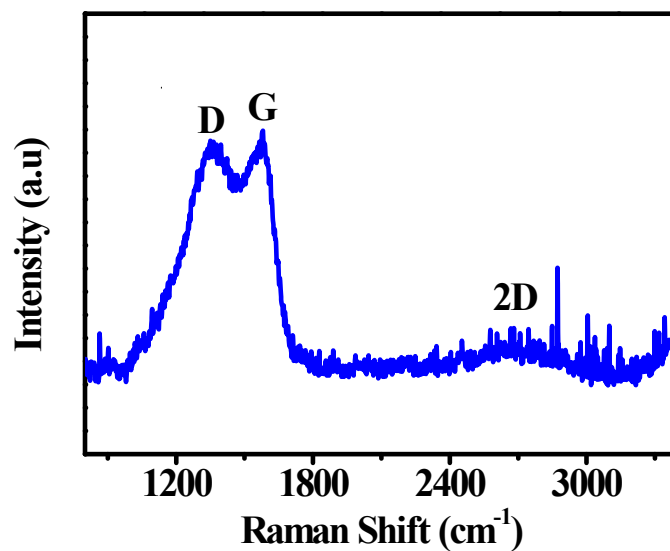

Fig. S2 Raman spectra of Cu-Nx-C.

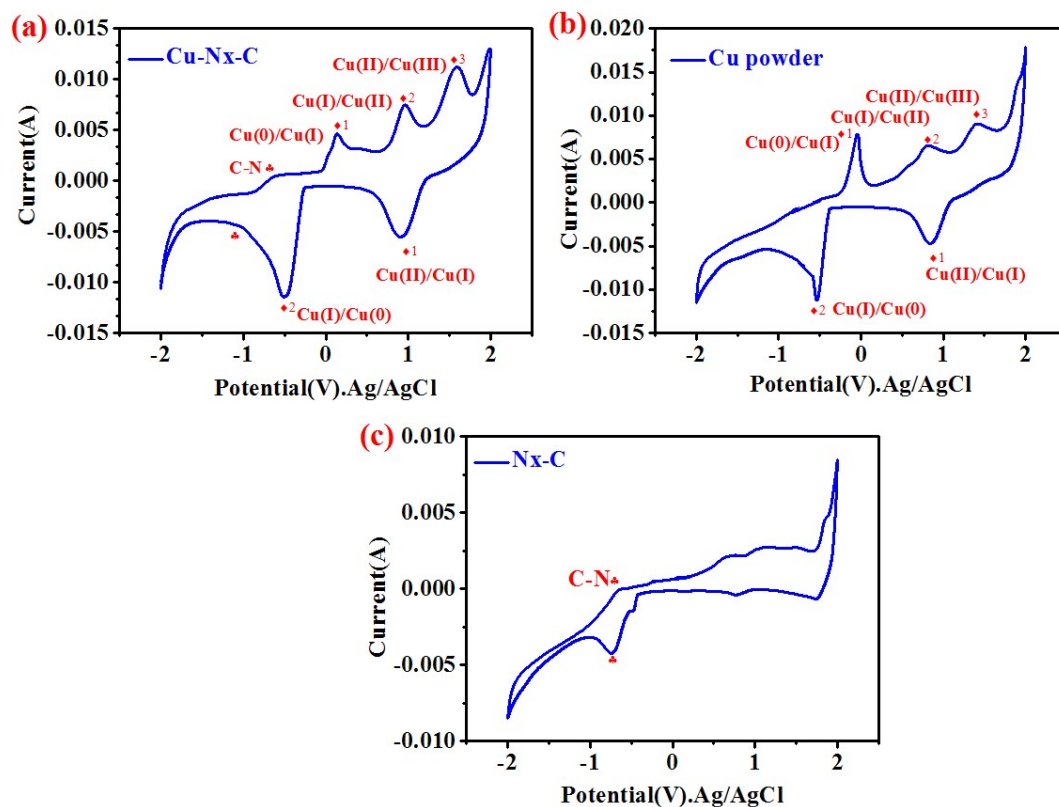

Fig. S3 Cyclic voltammetry of the Cu-Nx-C(a), Cu powder(b), and silk fibroin-driven porous carbon (Nx-C) without copper(c).

The Cu powder and the Cu-Nx-C displays the reversible formation of the Cu (0)-Cu(I)-Cu(II)-Cu(III)-Cu(0) species. The reversible oxidation of Cu(0)/Cu(I) to Cu(II) and Cu(III) could be observed both from Cu-Nx-C and Cu powder.<sup>1</sup> An additional peak was found in the CV of Cu-Nx-C, attributing to the Nx-C active site, which also appeared in the CV of Nx-C materials.<sup>2</sup> The presence of Nx-C also led to the positive shift of the reversible oxidation potential of Cu-Nx-C, due to the increasement of electron density near the copper sites.

#### Reference

- 1 H. H. Hassan, I. H. A. Badr, H. T. M. Abdel-Fatah, E. M. S. Elfeky and A. M. Abdel-Aziz, *Arabian Journal of Chemistry*, 2018, 11, 171.
- 2 S. Haldar, D. Chakraborty, B. Roy, G. Banappanavar, K. Rinku, D. Mullangi, P. Hazra, D. Kabra and R. Vaidyanathan, *Journal of the American Chemical Society*, 2018, 140, 13367.

#### Data of final product

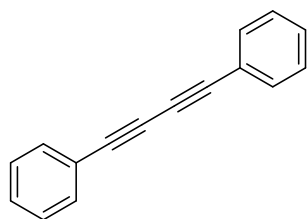

**1,4-diphenylbuta-1,3-diyne (2a):** Yield: 98%;  $^1\text{H NMR}$  (400 MHz,  $\text{CDCl}_3$ )  $\delta$  7.62 – 7.53 (m, 4H), 7.51 – 7.32 (m, 6H).

$^{13}\text{C NMR}$  (100 MHz,  $\text{CDCl}_3$ )  $\delta$  132.52, 129.22, 128.46, 121.83, 81.58, 73.95.

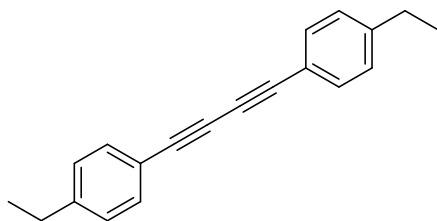

**1,4-bis(4-ethylphenyl)buta-1,3-diyne (2b):** Yield: 94%;  $^1\text{H NMR}$  (400 MHz,  $\text{CDCl}_3$ )  $\delta$  7.52 – 7.44 (m, 4H), 7.24 –

7.15 (m, 4H), 2.69 (q,  $J = 7.6$  Hz, 4H), 1.26 (t,  $J = 7.6$  Hz, 6H).  $^{13}\text{C NMR}$  (100 MHz,  $\text{CDCl}_3$ )  $\delta$  145.76, 132.51, 128.03,

119.05, 81.58, 73.47, 28.93, 15.24.

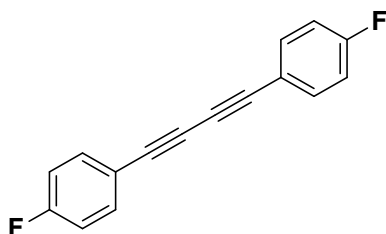

**1,4-bis(4-fluorophenyl)buta-1,3-diyne (2c):** Yield: 71%;  $^1\text{H NMR}$  (400 MHz,  $\text{CDCl}_3$ )  $\delta$  7.58 – 7.45 (m, 4H), 7.11 –

7.01 (m, 4H).  $^{13}\text{C NMR}$  (100 MHz,  $\text{CDCl}_3$ )  $\delta$  164.32, 161.82, 134.50, 134.58, 117.82, 116.02, 115.80, 80.43, 73.55,

29.71.

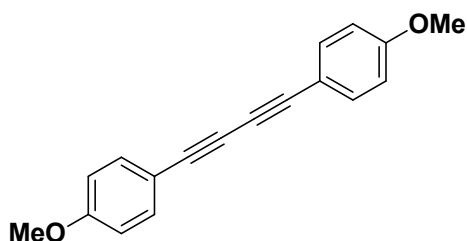

**1,4-bis(4-methoxyphenyl)buta-1,3-diyne (2d):** Yield: 91%;  $^1\text{H NMR}$  (400 MHz,  $\text{CDCl}_3$ )  $\delta$  7.56 – 7.42 (m, 4H), 6.95 –

6.82 (m, 4H), 3.85 (s, 6H).  $^{13}\text{C NMR}$  (100 MHz,  $\text{CDCl}_3$ )  $\delta$  160.25, 134.04, 113.97, 114.14, 81.23, 72.95, 55.34.

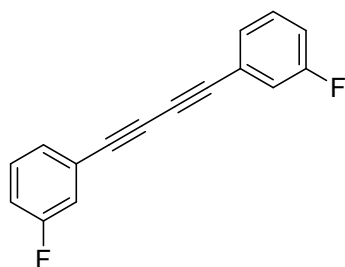

**1,4-bis(3-fluorophenyl)buta-1,3-diyne (2e):** Yield: 92%;  $^1\text{H NMR}$  (400 MHz,  $\text{CDCl}_3$ )  $\delta$  7.55 – 7.28 (m, 4H), 7.24 (dd,

$J = 8.5, 1.9$  Hz, 2H), 7.22 – 6.99 (m, 2H).  $^{13}\text{C NMR}$  (100 MHz,  $\text{CDCl}_3$ )  $\delta$  162.28 (d,  $J = 247.5$  Hz), 130.15 (d,  $J = 8.6$  Hz),

128.48 (d,  $J = 3.1$  Hz), 123.40 (d,  $J = 9.5$  Hz), 119.35, 119.12, 117.02, 116.81, 80.64 (d,  $J = 3.6$  Hz), 74.43.

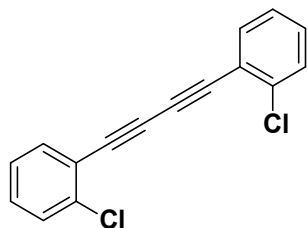

**1,4-bis(2-chlorophenyl)buta-1,3-diyne (2f):** Yield: 86%;  $^1\text{H NMR}$  (400 MHz,  $\text{CDCl}_3$ )  $\delta$  7.60 (dd,  $J = 7.6, 1.6$  Hz, 2H), 7.45 (dd,  $J = 8.0, 1.0$  Hz, 2H), 7.30 (dtd,  $J = 8.8, 7.5, 1.5$  Hz, 4H).  $^{13}\text{C NMR}$  (100 MHz,  $\text{CDCl}_3$ )  $\delta$  137.00, 134.38, 130.27, 129.46, 126.55, 121.85, 79.42, 78.40.

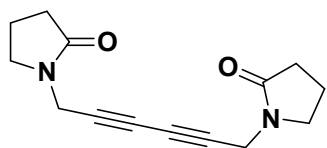

**1,1'-(hexa-2,4-diyne-1,6-diyl)bis(pyrrolidin-2-one) (2g):** Yield: 63%;  $^1\text{H NMR}$  (400 MHz,  $\text{CDCl}_3$ )  $\delta$  4.18 (s, 2H), 3.48 (t,  $J = 7.1$  Hz, 2H), 2.40 (t,  $J = 8.1$  Hz, 2H), 2.16 – 1.98 (m, 2H).  $^{13}\text{C NMR}$  (100 MHz,  $\text{CDCl}_3$ )  $\delta$  174.54, 72.70, 68.05, 46.44, 32.54, 30.47, 17.59.

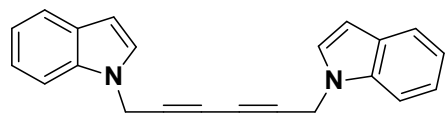

**1,6-di(1H-indol-1-yl)hexa-2,4-diyne (2h):** Yield: 88%;  $^1\text{H NMR}$  (400 MHz,  $\text{CDCl}_3$ )  $\delta$  7.66 (d,  $J = 7.9$  Hz, 2H), 7.38 (dd,  $J = 8.2, 0.7$  Hz, 2H), 7.30 – 7.25 (m, 2H), 7.20 – 7.12 (m, 4H), 6.56 (dd,  $J = 3.2, 0.7$  Hz, 2H), 4.94 (s, 4H).  $^{13}\text{C NMR}$  (100 MHz,  $\text{CDCl}_3$ )  $\delta$  135.78, 128.88, 127.22, 122.10, 121.17, 120.03, 119.78, 109.22, 102.50, 73.30, 69.09, 36.34.

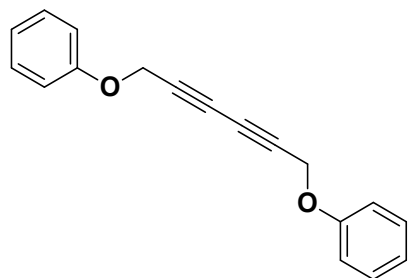

**1,6-diphenoxyhexa-2,4-diyne (2i):** Yield: 72%;  $^1\text{H NMR}$  (400 MHz,  $\text{CDCl}_3$ )  $\delta$  7.44 – 7.27 (m, 4H), 7.08 – 6.92 (m, 6H), 4.78 (s, 4H).  $^{13}\text{C NMR}$  (100 MHz,  $\text{CDCl}_3$ )  $\delta$  157.43, 129.57, 121.79, 114.90, 74.71, 71.04, 56.19.

### Spectra Data

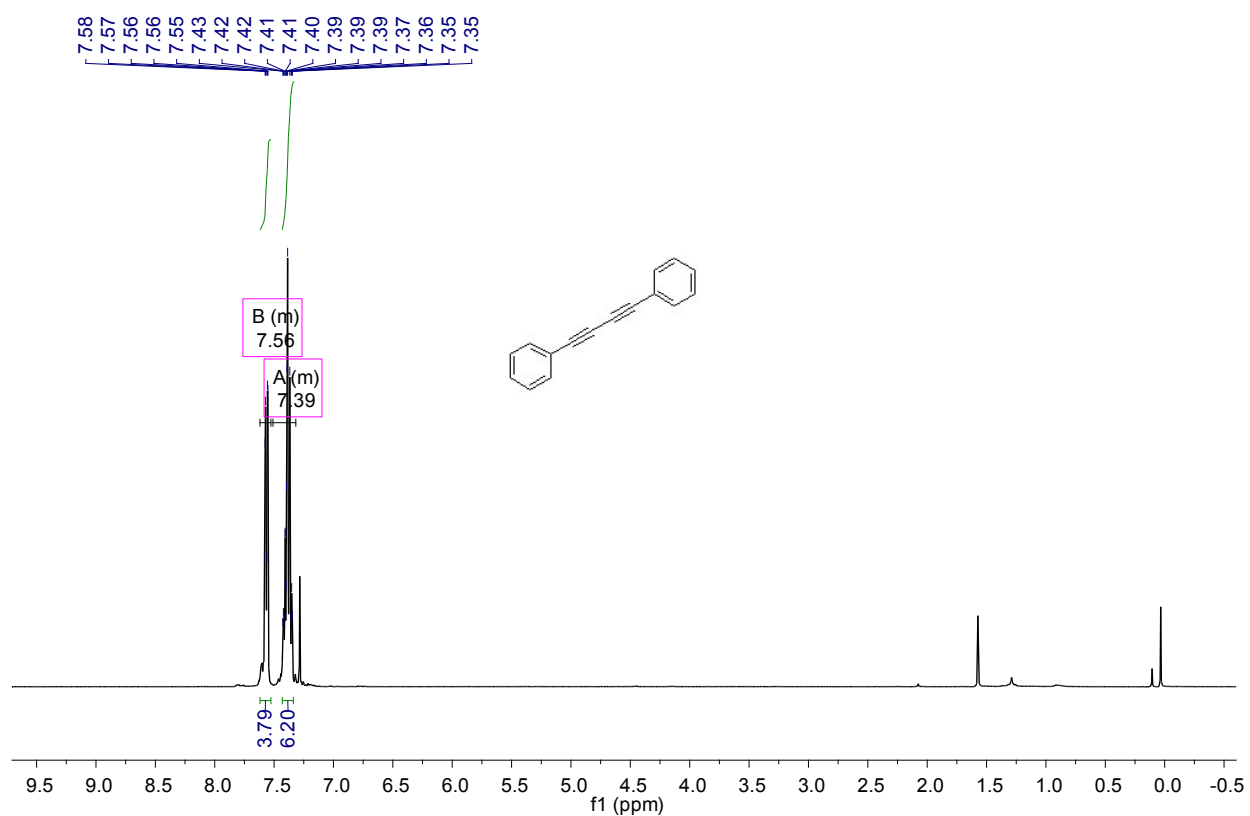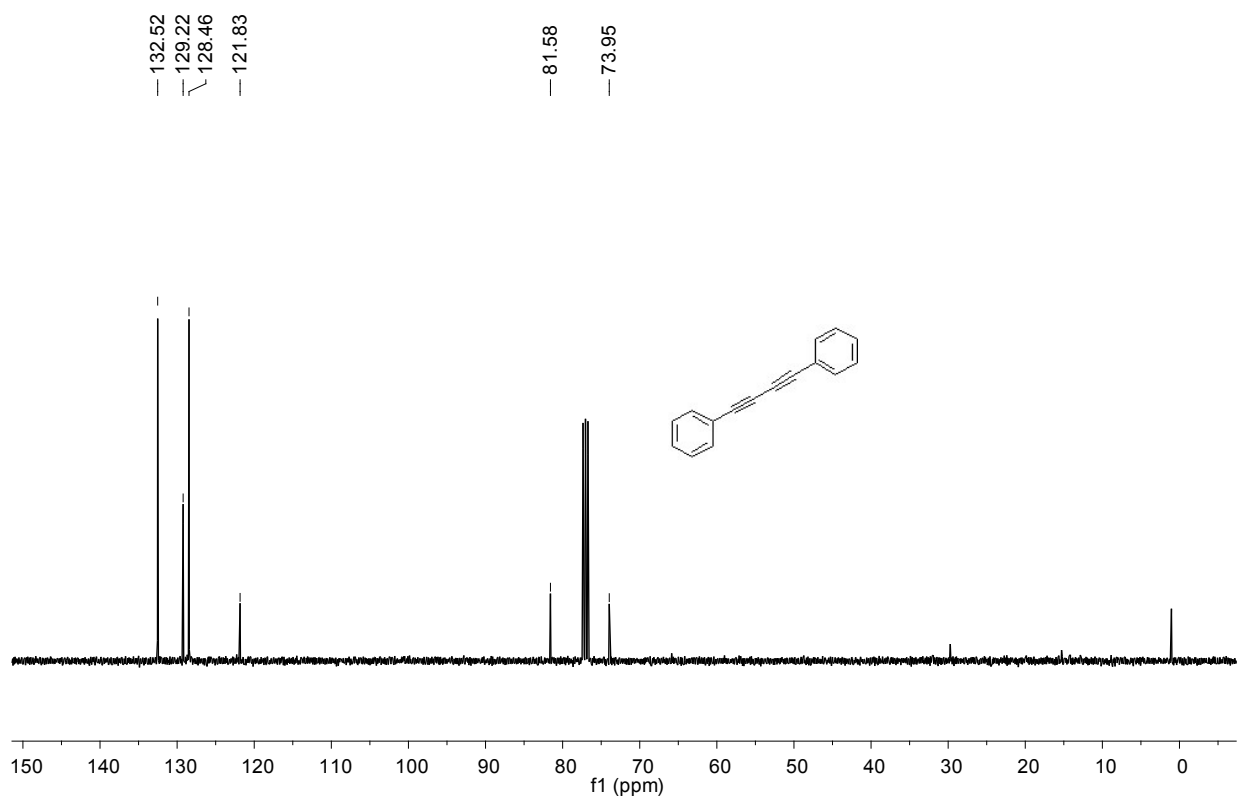

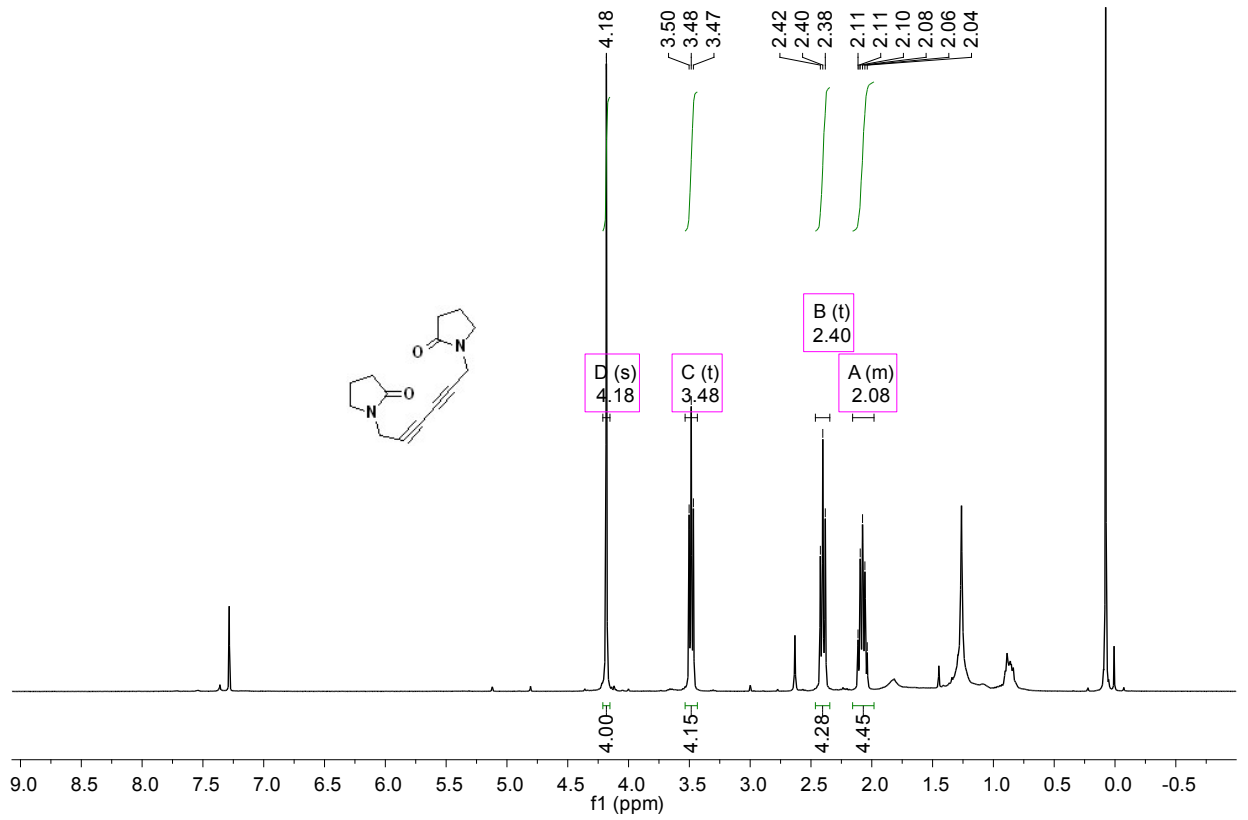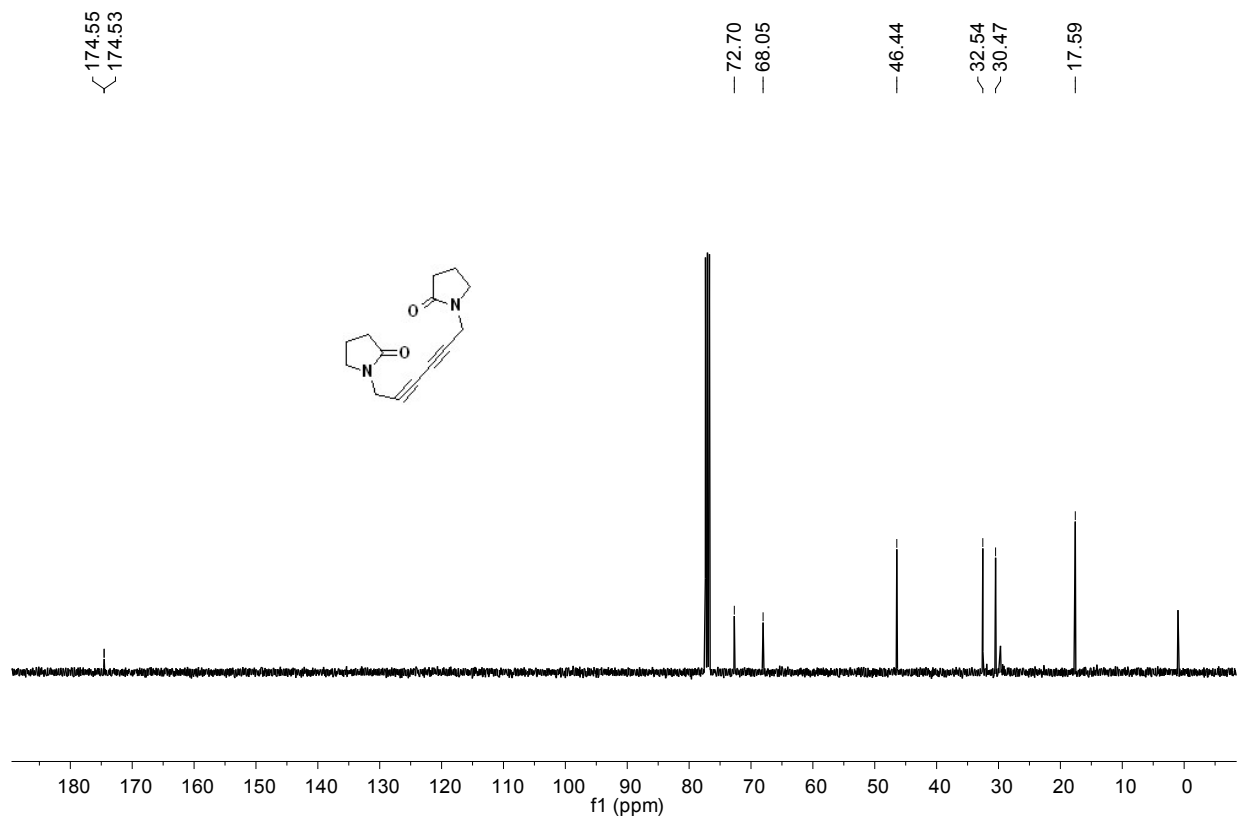

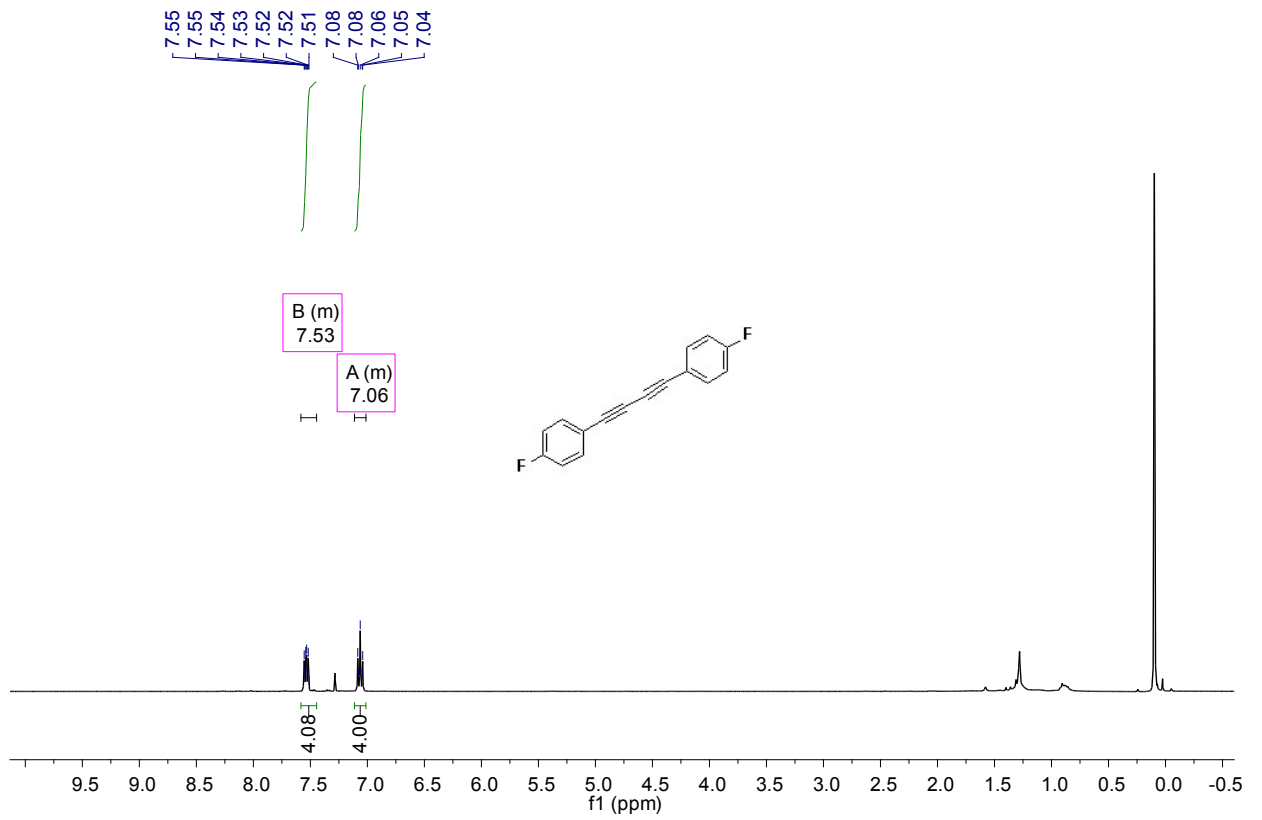

164.32  
161.82

134.58  
134.50

117.82  
116.02  
115.80

80.43  
73.55

29.71

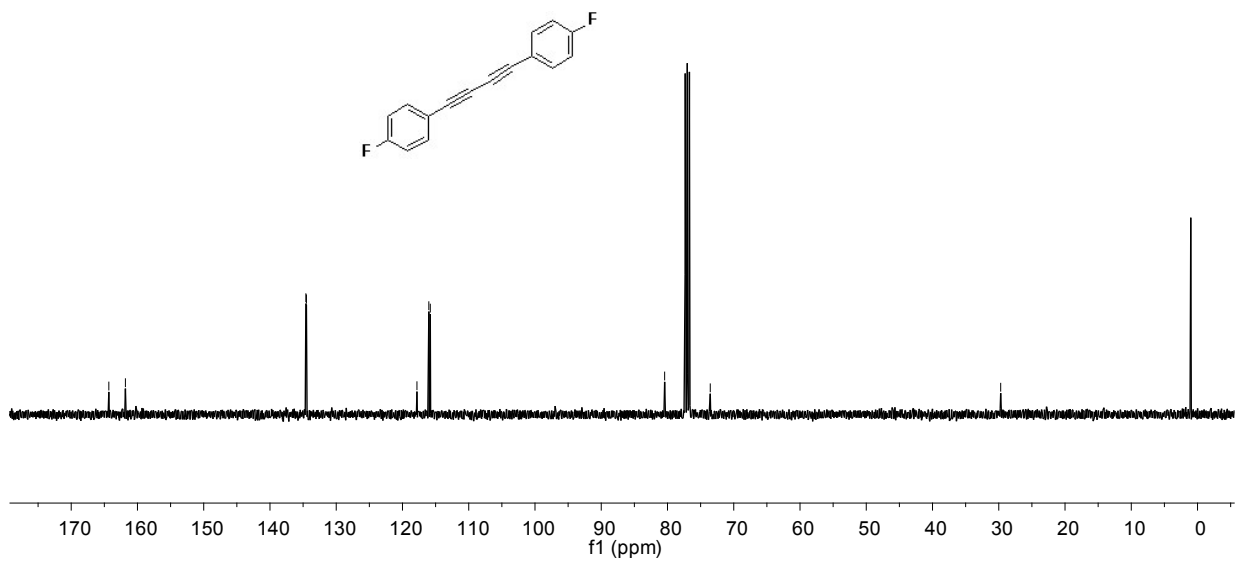



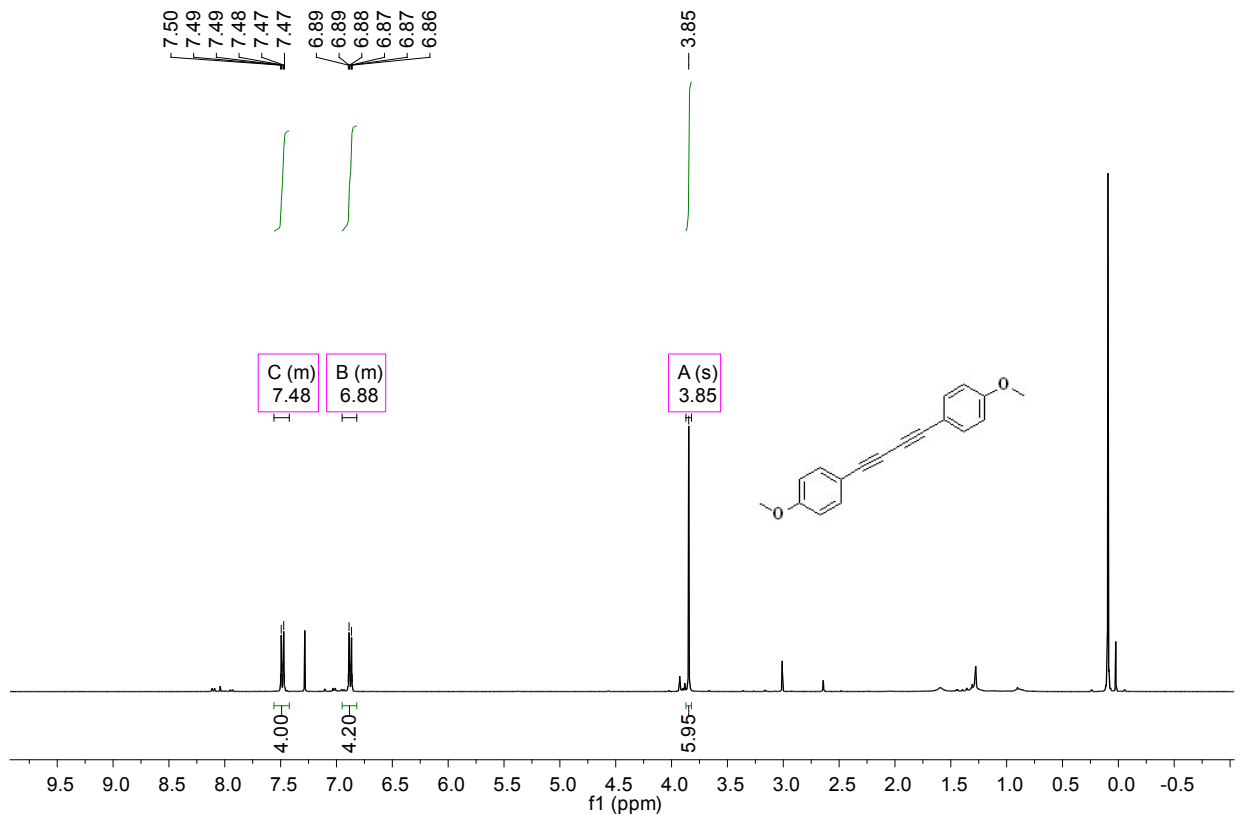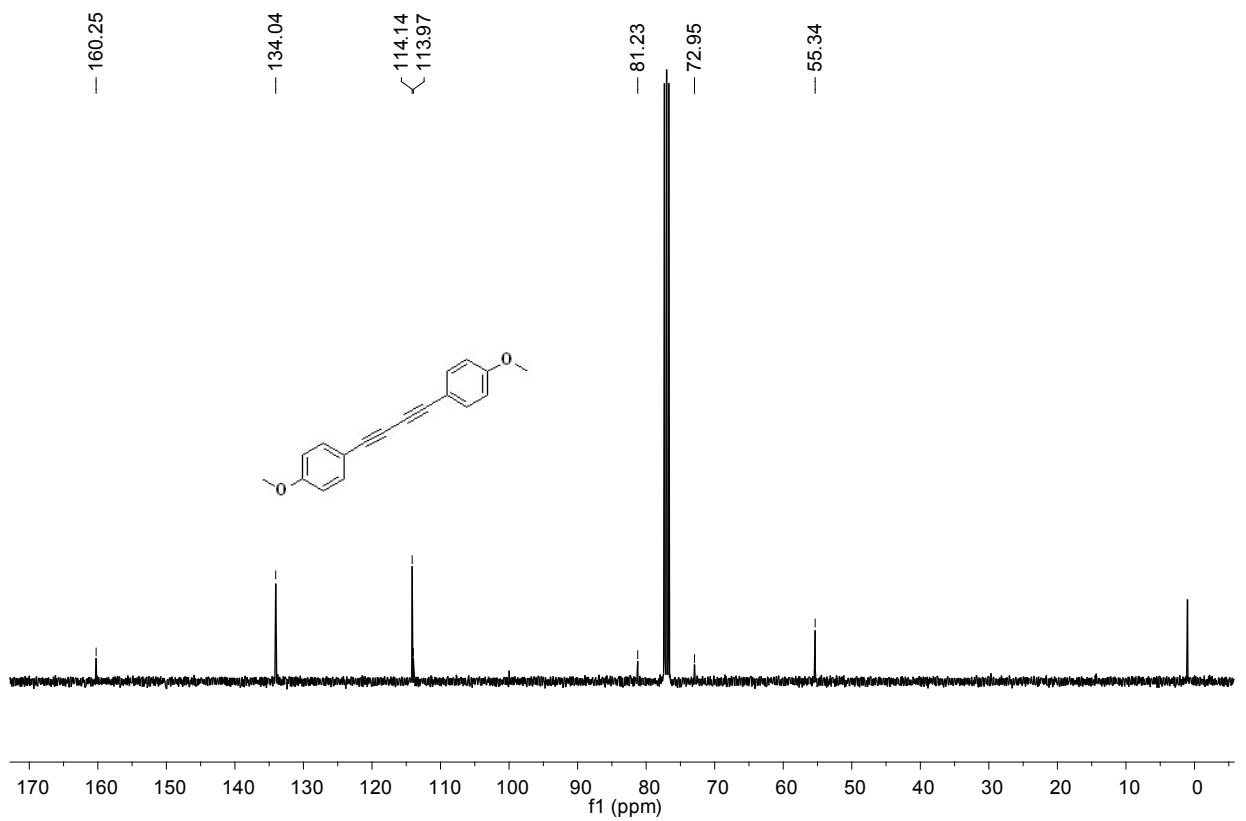

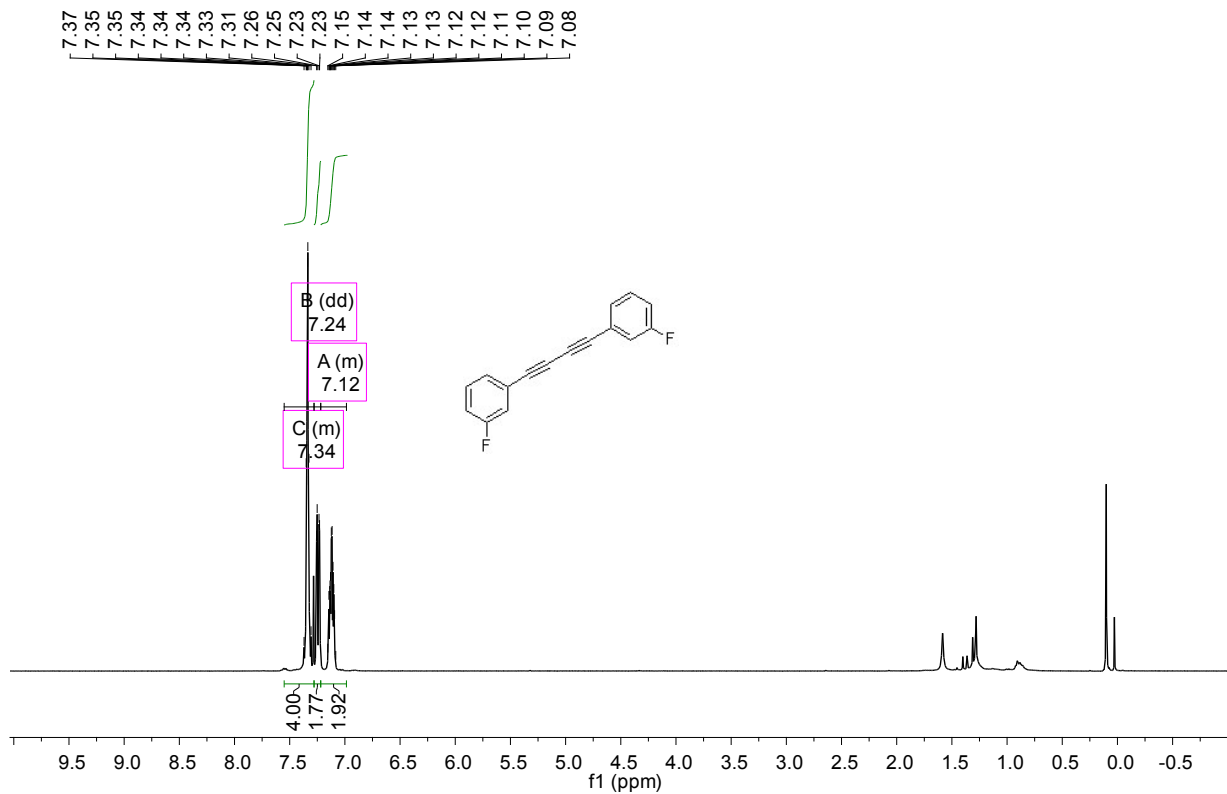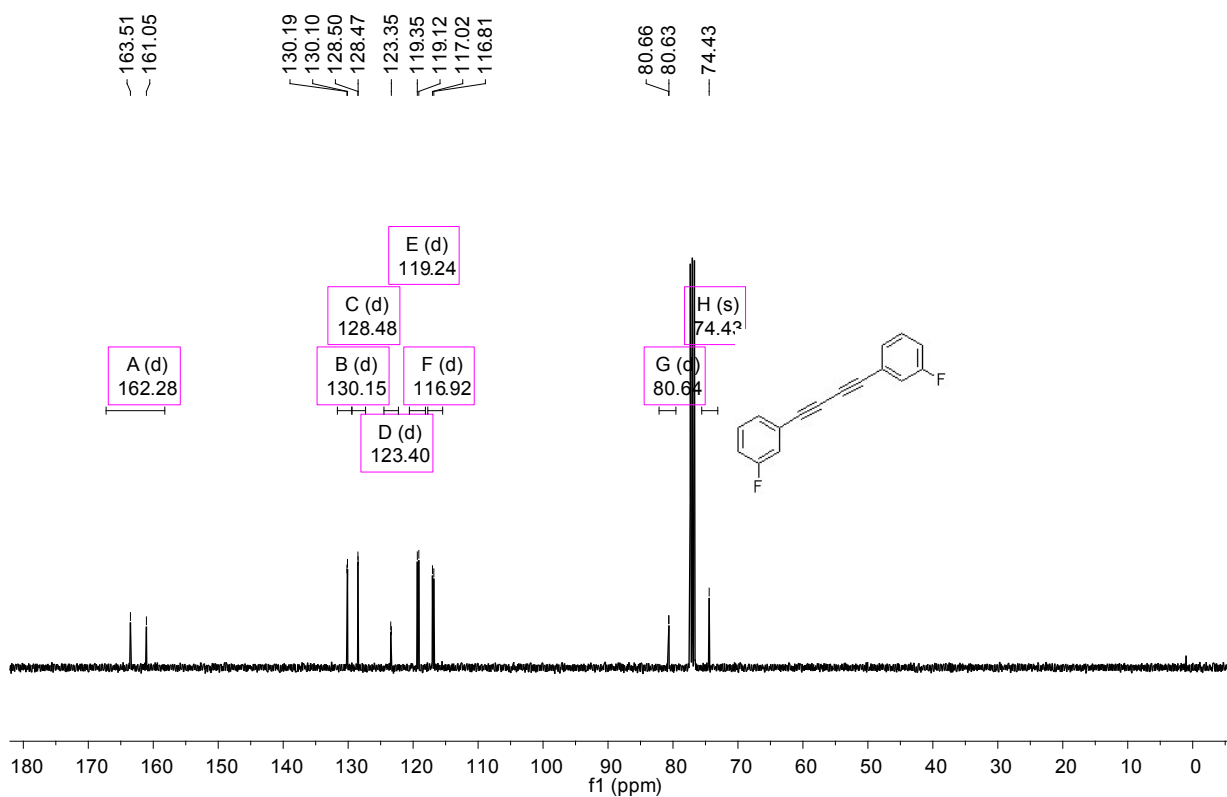

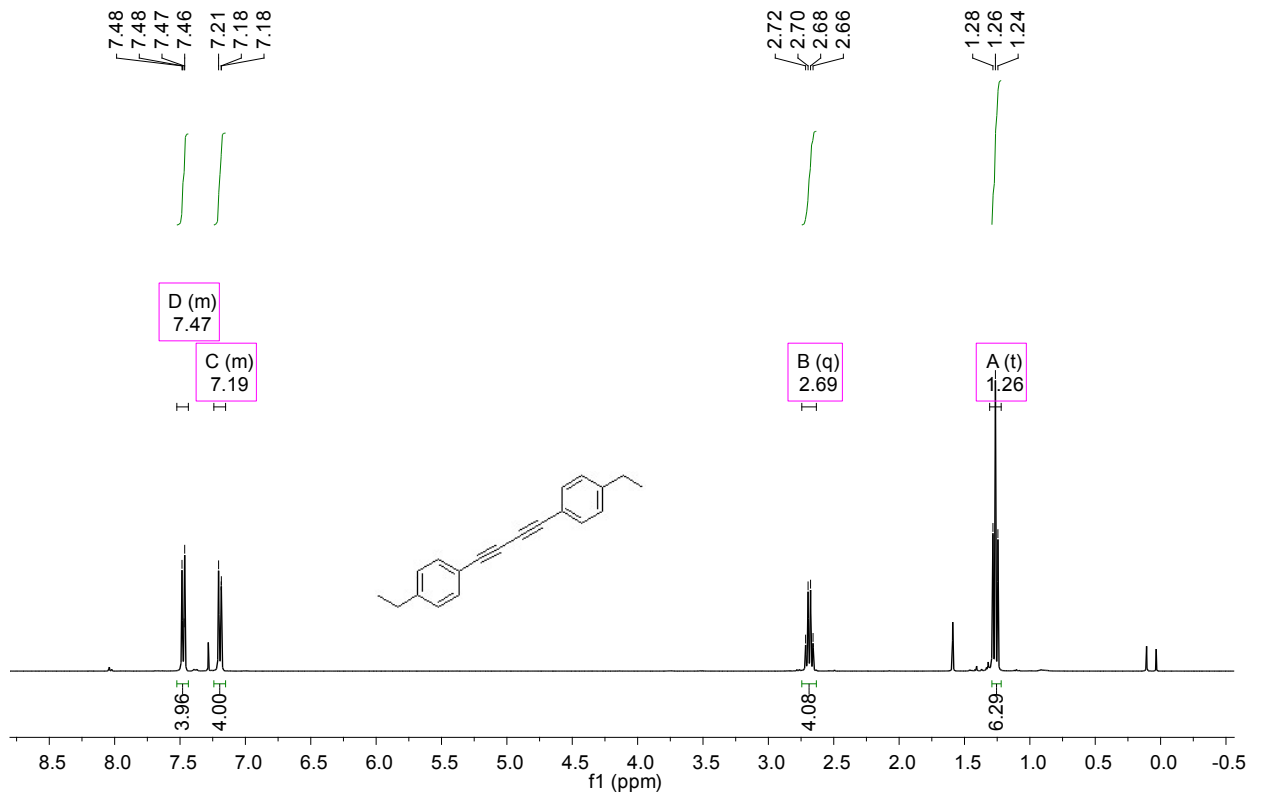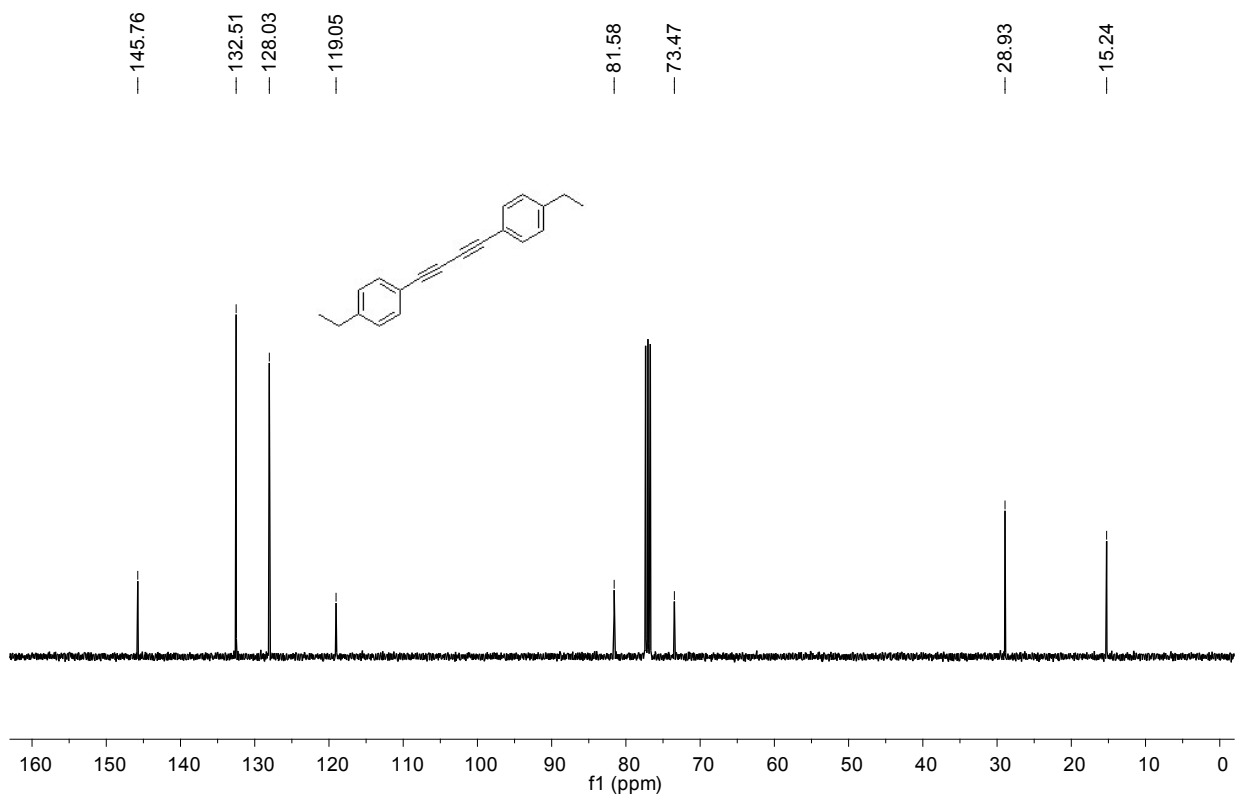

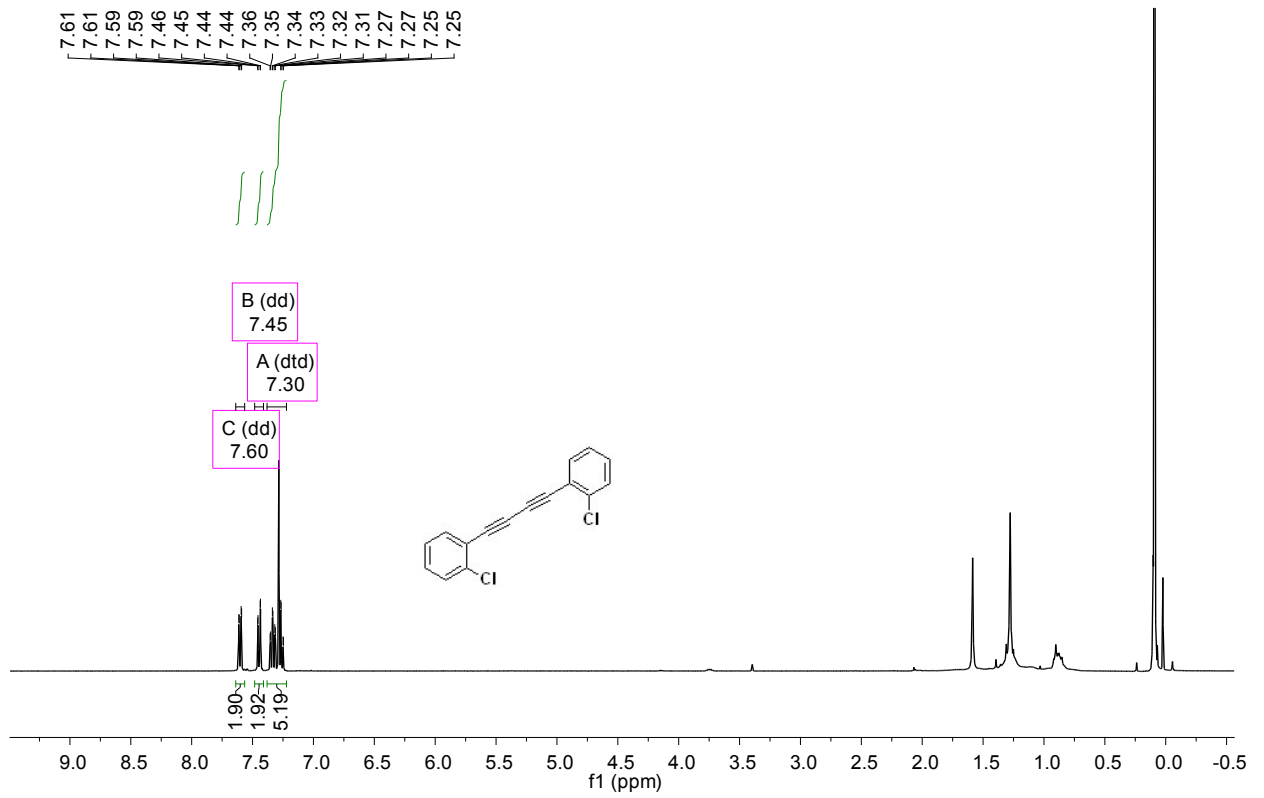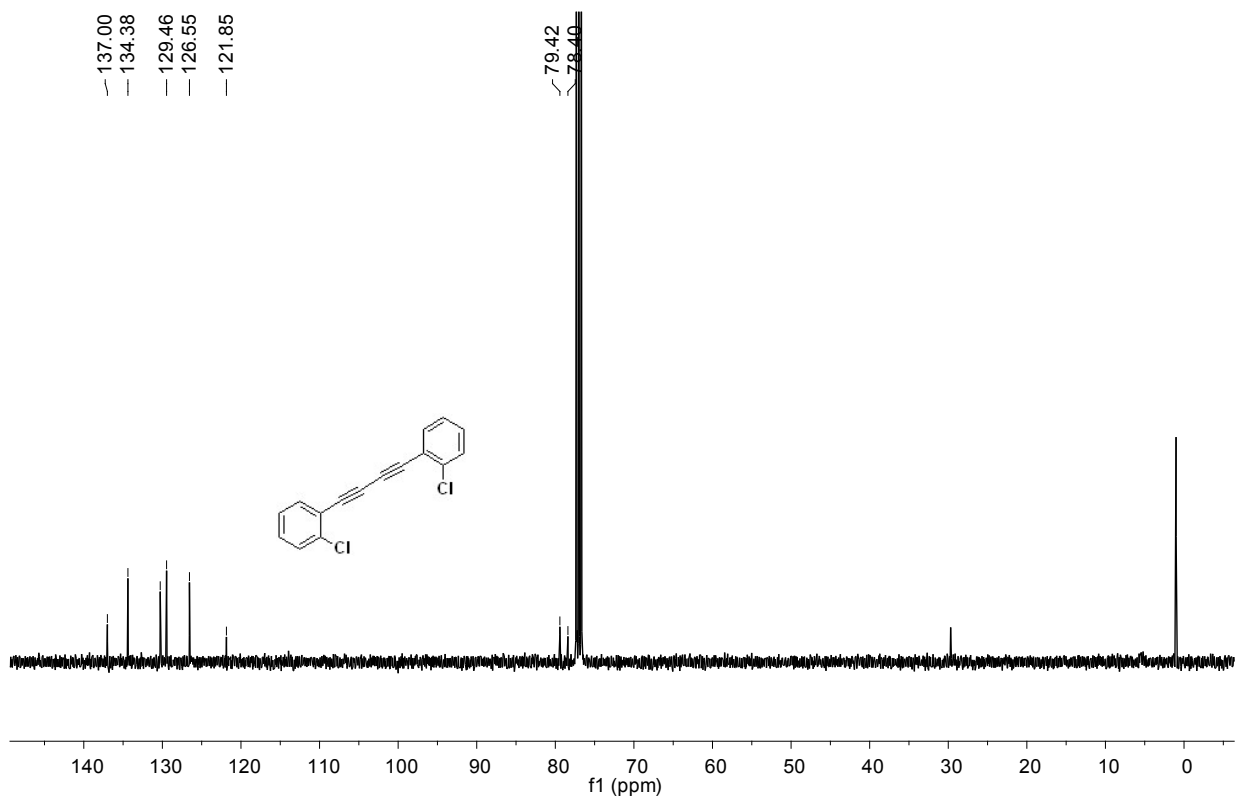

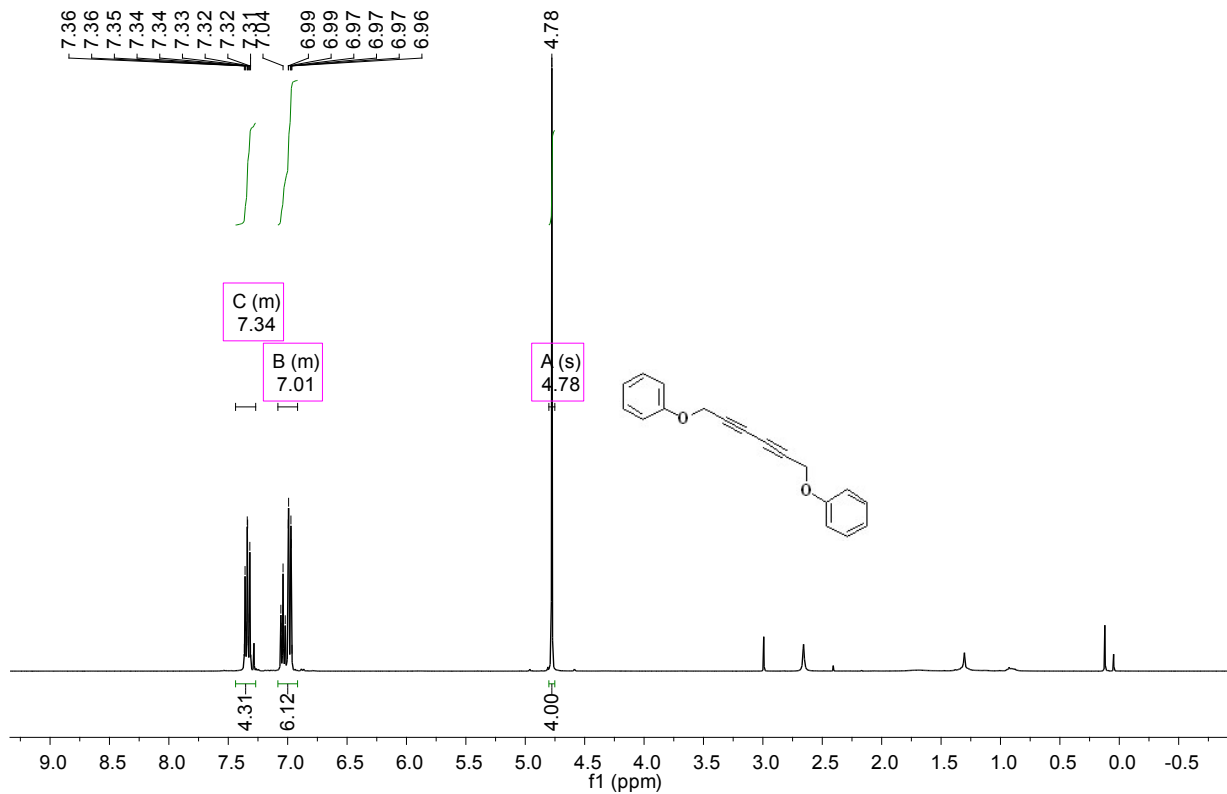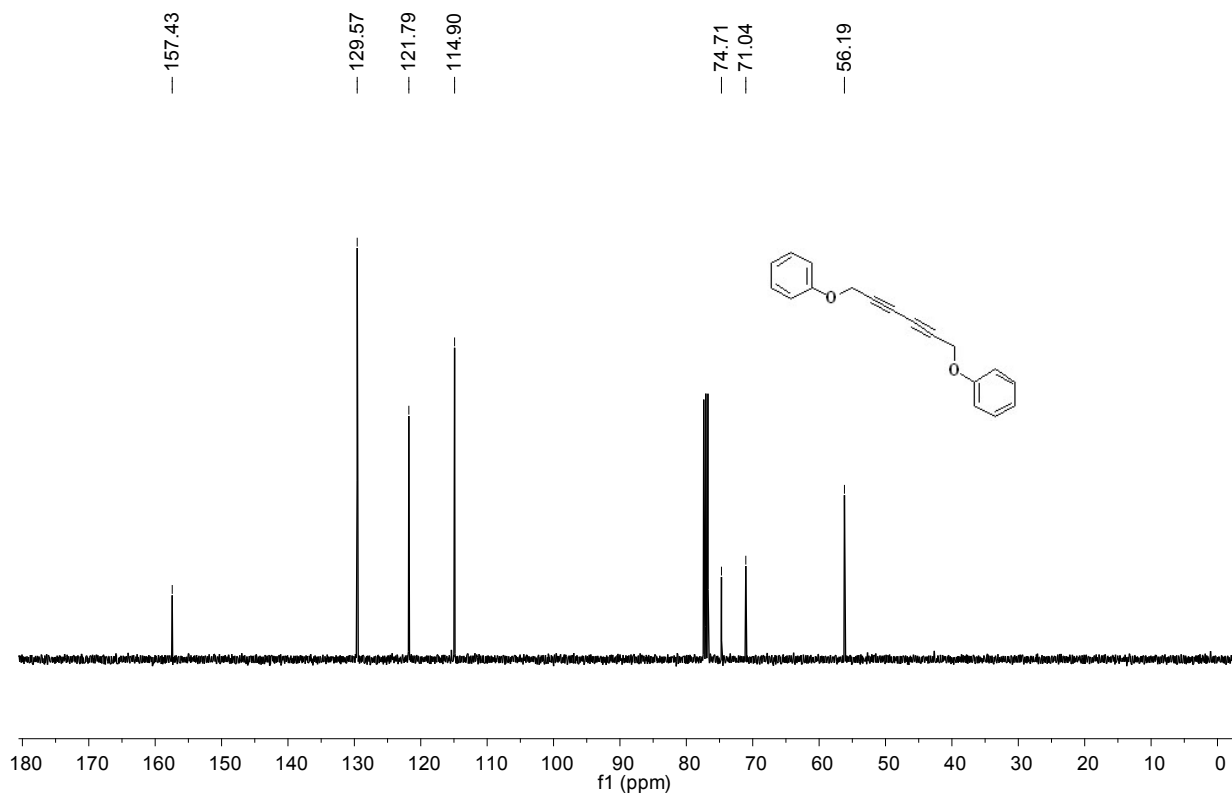

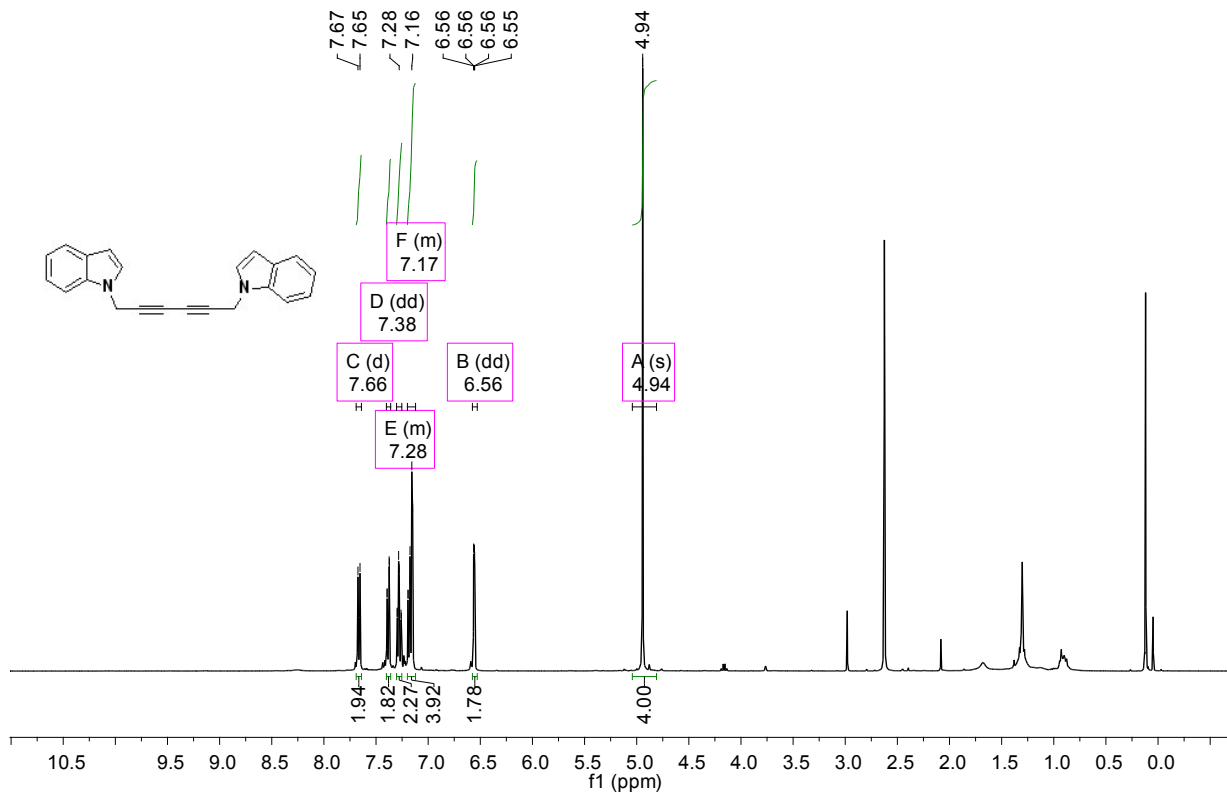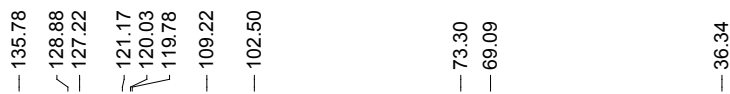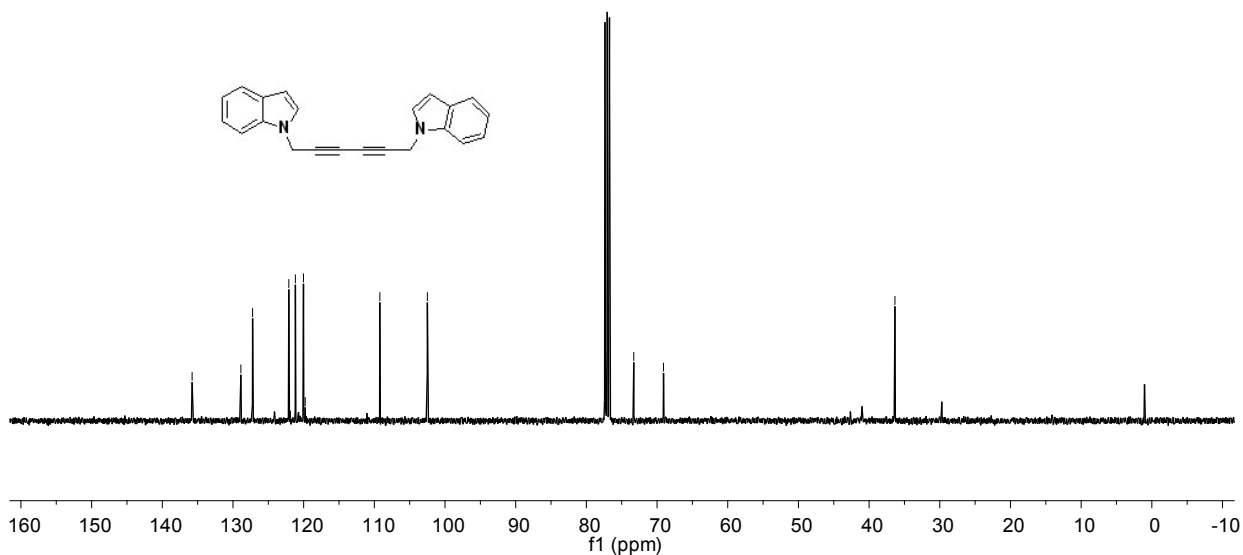

Supplement: d0nj04801a1.pdf [file d0nj04801a1.pdf]
